# Supplementary material
Source: PubMed Central journal article supplement (PMC6509652)
Supplement: JB.00745-18-s0001.pdf [file JB.00745-18-s0001.pdf]

## Supplemental Materials

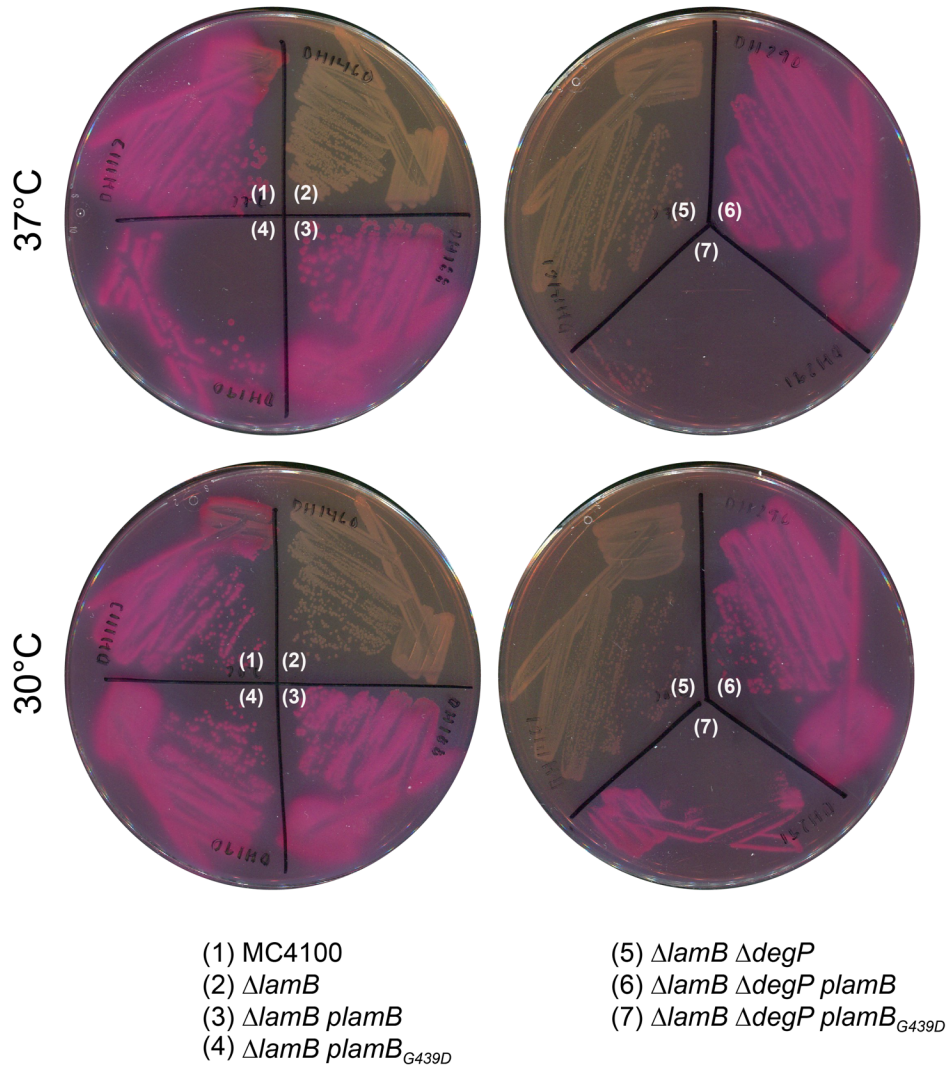

**Figure S1: Growth phenotypes of relevant strains on MacConkey media containing maltodextrins.** The indicated strains were streaked for single colonies on MacConkey indicator media supplemented with maltodextrins and incubated at 30°C or 37°C. Strains that do not contain plasmid-encoded *lamB* carry an empty vector control.

**Table S1: Summary of relevant phenotypes**

| <b>Genotype</b>                         | <b>MacConkey maltodextrin phenotype (30°C)</b> | <b>MacConkey maltodextrin phenotype (37°C)</b> | <b>Minimal maltodextrin phenotype (30°C, 37°C)</b> |
|-----------------------------------------|------------------------------------------------|------------------------------------------------|----------------------------------------------------|
| MC4100 wild-type                        | Red                                            | Red                                            | +                                                  |
| <i>ΔlamB</i>                            | White                                          | White                                          | -                                                  |
| <i>ΔlamB plamB<sup>+</sup></i>          | Red                                            | Red                                            | +                                                  |
| <i>ΔlamB plamB<sub>G439D</sub></i>      | Red                                            | Red                                            | +                                                  |
| <i>ΔlamBΔdegP</i>                       | White                                          | White                                          | -                                                  |
| <i>ΔlamBΔdegP plamB<sup>+</sup></i>     | Red                                            | Red                                            | +                                                  |
| <i>ΔlamBΔdegP plamB<sub>G439D</sub></i> | Red                                            | Dead                                           | +                                                  |

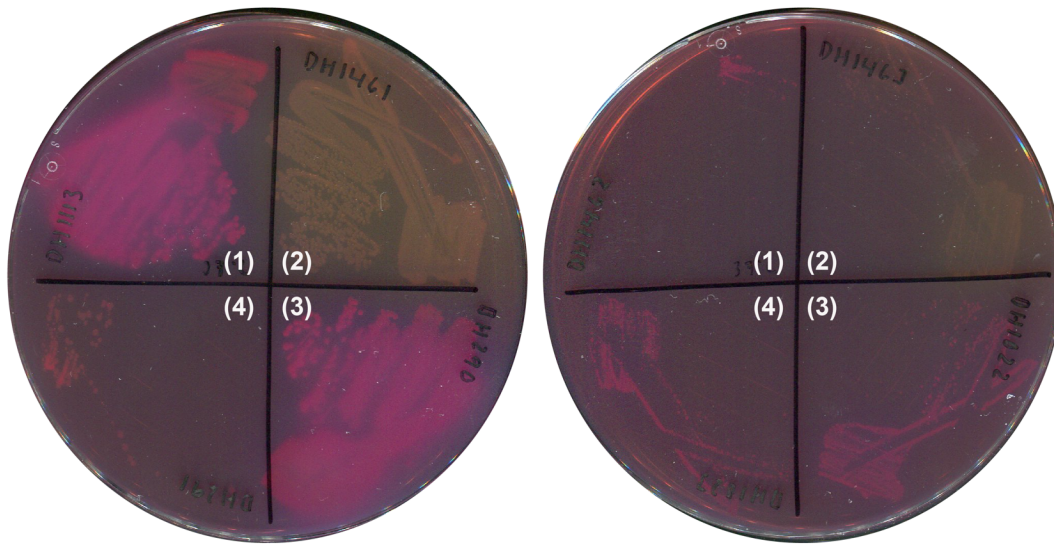

- (1) MC4100
- (2)  $\Delta lamB \Delta degP$
- (3)  $\Delta lamB \Delta degP plamB$
- (4)  $\Delta lamB \Delta degP plamB_{G439D}$

- (1) MC4100 *rseA::kan*
- (2)  $\Delta lamB \Delta degP rseA::kan$
- (3)  $\Delta lamB \Delta degP plamB rseA::kan$
- (4)  $\Delta lamB \Delta degP plamB_{G439D} rseA::kan$

**Figure S2: Deletion of *rseA* prevents growth on MacConkey maltodextrins.** The indicated strains were streaked to single colonies on MacConkey media containing maltodextrins at 37°C. Strains that do not carry a plasmid-encoded *lamB* carry an empty vector control.

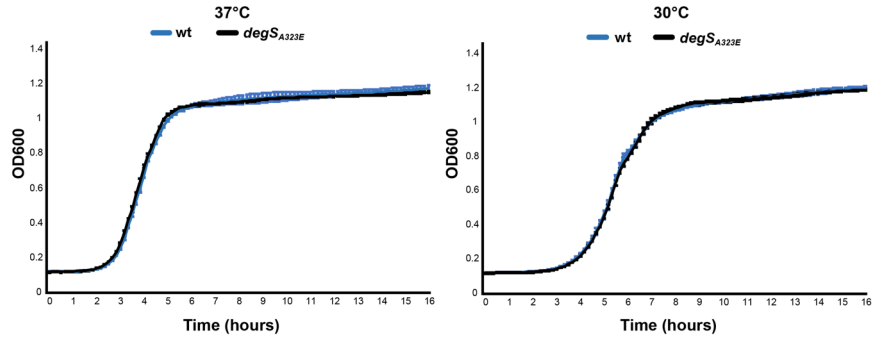

**Figure S3: Growth phenotype of *degS*<sub>A323E</sub>.** Growth of wild-type and *degS*<sub>A323E</sub> cells were monitored by OD600 at 30°C and 37°C for 16 hours. The OD600 was plotted over time and represents the average of three biological replicates +/- the standard error of the mean (SEM).

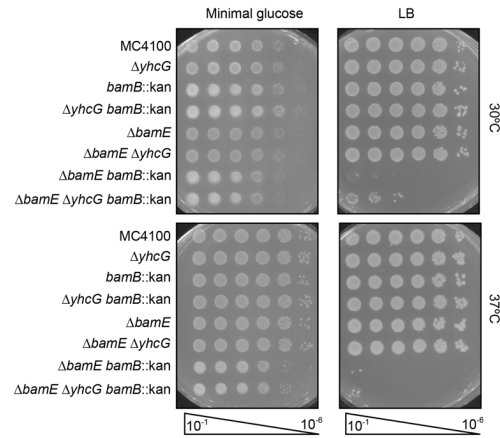

**Figure S4: Deletion of *yhcG* in *bamB*, *bamE*, and  $\Delta bamB \Delta bamE$  null backgrounds does not alter growth phenotypes.** The indicated strains were serially diluted and spotted onto minimal glucose and LB media at the indicated temperatures.

**Table S2: Strains, Plasmids, and Oligonucleotides**

| <i>E. coli</i> K-12 strains | Genotype and relevant features                                                                 | Reference  |
|-----------------------------|------------------------------------------------------------------------------------------------|------------|
| MC4100                      | <i>F-araD139 (argF-lac)U169 rpsL150 relA1 flb5301 deoC1 ptsF25 thi</i>                         | (1)        |
| JCM158                      | MC4100 <i>ara</i> <sup>r/-</sup>                                                               | (2)        |
| NR669                       | $\lambda_{att}$ <i>rpoHP3-lacZ</i>                                                             | (3)        |
| MG2930                      | $\Delta lamB$                                                                                  | This study |
| MG2967                      | $\Delta lamB$ pZS21cam:: <i>lamB</i>                                                           | This study |
| MG2968                      | $\Delta lamB$ pZS21cam:: <i>lamB</i> <sub>G439A</sub>                                          | This study |
| MG2969                      | $\Delta lamB$ pZS21cam:: <i>lamB</i> <sub>G439D</sub>                                          | This study |
| KT26                        | $\Delta lamB \Delta degP$ <i>degS</i> <sub>A323E</sub> pZS21cam:: <i>lamB</i> <sub>G439D</sub> | This study |
| BH17                        | $\Delta lptD$ pET23-42:: <i>lptD</i> <sub>Y721D</sub>                                          | This study |

|         |                                                                                                                  |            |
|---------|------------------------------------------------------------------------------------------------------------------|------------|
| BH26    | $\Delta lptD$ pET23-42:: <i>lptD</i>                                                                             | This study |
| BH92    | <i>bamB</i> ::Tn5KAN-I-SceI ( <i>bamB</i> ::kan)                                                                 | (4)        |
| BH273   | $\Delta lamB \Delta degP$                                                                                        | This study |
| BH290   | $\Delta lamB \Delta degP$ pZS21cam:: <i>lamB</i>                                                                 | This study |
| BH291   | $\Delta lamB \Delta degP$ pZS21cam:: <i>lamB</i> <sub>G439D</sub>                                                | This study |
| BH1016  | MC4100 $\lambda_{att}$ <i>rpoH-P3-lacZ</i>                                                                       | This study |
| BH1017  | $\Delta surA$ $\lambda_{att}$ <i>rpoH-P3-lacZ</i>                                                                | This study |
| BH1022  | $\Delta lamB \Delta degP$ <i>rseA</i> ::kan pZS21cam:: <i>lamB</i>                                               | This study |
| BH1023  | $\Delta lamB \Delta degP$ <i>rseA</i> ::kan pZS21cam:: <i>lamB</i> <sub>G439D</sub>                              | This study |
| BH1113  | MC4100 pZS21cam (empty)                                                                                          | This study |
| BH1162  | $\Delta rseA$ $\lambda_{att}$ <i>rpoH-P3-lacZ</i>                                                                | This study |
| BH1190  | MC4100 <i>yhcG</i> ::kan                                                                                         | This study |
| BH1321  | <i>degP</i> ::kan <i>yadC</i> ::Tn10                                                                             | This study |
| BH1326  | MC4100 <i>yhcG</i> ::kan $\lambda_{att}$ <i>rpoH-P3-lacZ</i>                                                     | This study |
| BH1327  | $\Delta surA$ <i>yhcG</i> ::kan $\lambda_{att}$ <i>rpoH-P3-lacZ</i>                                              | This study |
| BH1346  | $\Delta lamB \Delta degP$ <i>yhcG</i> ::kan pZS21cam:: <i>lamB</i>                                               | This study |
| BH1347a | $\Delta lamB \Delta degP$ <i>yhcG</i> ::kan pZS21cam:: <i>lamB</i> <sub>G439D</sub>                              | This study |
| BH1347b | $\Delta lamB \Delta degP$ <i>degS</i> <sub>A323E</sub> <i>yhcG</i> ::kan pZS21cam:: <i>lamB</i> <sub>G439D</sub> | This study |
| BH1350  | MC4100 <i>degS</i> <sub>A323E</sub> <i>yhcG</i> ::kan                                                            | This study |
| BH1363  | $\Delta bamE$ <i>degS</i> <sub>A323E</sub> <i>yhcG</i> ::kan                                                     | This study |
| BH1366  | MC4100 $\Delta yhcG$                                                                                             | This study |
| BH1367  | MC4100 <i>degS</i> <sub>A323E</sub> $\Delta yhcG$                                                                | This study |
| BH1368  | $\Delta bamE$ <i>degS</i> <sub>A323E</sub> $\Delta yhcG$                                                         | This study |

|         |                                                                             |            |
|---------|-----------------------------------------------------------------------------|------------|
| BH1372  | <i>ΔlptD yhcG::kan pET23/42::lptD</i>                                       | This study |
| BH1373  | <i>ΔlptD degS<sub>A323E</sub> yhcG::kan pET23/42::lptD</i>                  | This study |
| BH1374  | <i>ΔlptD yhcG::kan pET23/42::lptD<sub>Y721D</sub></i>                       | This study |
| BH1375  | <i>ΔlptD degS<sub>A323E</sub> yhcG::kan pET23/42::lptD<sub>Y721D</sub></i>  | This study |
| BH1378  | <i>ΔbamE ΔyhcG</i>                                                          | This study |
| BH1380  | MC4100 <i>degS<sub>A323E</sub> yhcG::kan λ<sub>att</sub> rpoH-P3-lacZ</i>   | This study |
| BH1381  | <i>ΔsurA degS<sub>A323E</sub> yhcG::kan λ<sub>att</sub> rpoH-P3-lacZ</i>    | This study |
| BH1387  | <i>ΔrseA yhcG::kan λ<sub>att</sub> rpoH-P3-lacZ</i>                         | This study |
| BH1388  | <i>ΔrseA degS<sub>A323E</sub> yhcG::kan λ<sub>att</sub> rpoH-P3-lacZ</i>    | This study |
| BH1392  | <i>bamB::kan ΔyhcG</i>                                                      | This study |
| BH1393  | <i>degS<sub>A323E</sub> ΔyhcG bamB::kan</i>                                 | This study |
| BH1394  | <i>ΔbamE bamB::kan ΔyhcG</i>                                                | This study |
| BH1395  | <i>ΔbamE degS<sub>A323E</sub> ΔyhcG bamB::kan</i>                           | This study |
| BH1455a | MC4100 <i>yadC::Tn10</i>                                                    | This study |
| BH1456a | <i>ΔlamB yadC::Tn10</i>                                                     | This study |
| BH1457a | <i>ΔlamB yadC::Tn10 pZS21cam::lamB</i>                                      | This study |
| BH1458a | <i>ΔlamB yadC::Tn10 pZS21cam::lamB<sub>G439D</sub></i>                      | This study |
| BH1459a | MC4100 <i>degP<sub>S210A</sub> yadC::Tn10</i>                               | (5)        |
| BH1460a | <i>ΔlamB degP<sub>S210A</sub> yadC::Tn10</i>                                | This study |
| BH1460b | <i>ΔlamB pZS21cam (empty)</i>                                               | This study |
| BH1461a | <i>ΔlamB degP<sub>S210A</sub> yadC::Tn10 pZS21cam::lamB</i>                 | This study |
| BH1461b | <i>ΔlamB ΔdegP pZS21cam (empty)</i>                                         | This study |
| BH1462a | <i>ΔlamB degP<sub>S210A</sub> yadC::Tn10 pZS21cam::lamB<sub>G439D</sub></i> | This study |

| BH1462b                       | MC4100 <i>rseA</i> ::kan pZS21cam (empty)                                                       | This study |
|-------------------------------|-------------------------------------------------------------------------------------------------|------------|
| BH1463b                       | $\Delta lamB \Delta degP$ <i>rseA</i> ::kan pZS21cam (empty)                                    | This study |
| BH1464                        | MC4100 <i>yhcG</i> ::kan pZS21cam (empty)                                                       | This study |
| BH1467                        | MC4100 <i>degS</i> <sub>A323E</sub> <i>yhcG</i> ::kan pZS21cam (empty)                          | This study |
| BH1466                        | $\Delta lamB \Delta degP$ <i>yhcG</i> ::kan pZS21cam (empty)                                    | This study |
| BH1469                        | $\Delta lamB \Delta degP$ <i>degS</i> <sub>A323E</sub> <i>yhcG</i> ::kan pZS21cam (empty)       | This study |
| BH1470                        | $\Delta lamB \Delta degP$ <i>degS</i> <sub>A323E</sub> <i>yhcG</i> ::kan pZS21cam:: <i>lamB</i> | This study |
| Plasmids                      | Description                                                                                     | Reference  |
| pZS21                         | Low-copy expression vector, P <sub>LtetO-1</sub> -driven vector                                 | (6)        |
| pET23/42                      | pET23a(+) with multiple cloning site of pET42a(+), P <sub>T7</sub> -dependent expression vector | (7)        |
| pBAD33                        | Cam <sup>R</sup> cloning vector                                                                 | (8)        |
| pZS21:: <i>lamB</i>           | <i>lamB</i> cloned into pZS21 vector backbone                                                   | This study |
| <i>plamB</i>                  | pZS21(cam <sup>R</sup> ):: <i>lamB</i> , pZS21:: <i>lamB</i> made to be Cam <sup>R</sup>        | This study |
| <i>plamB</i> <sub>G439A</sub> | pZS21(cam <sup>R</sup> ):: <i>lamB</i> <sub>G439A</sub>                                         | This study |
| <i>plamB</i> <sub>G439D</sub> | pZS21(cam <sup>R</sup> ):: <i>lamB</i> <sub>G439D</sub>                                         | This study |
| <i>plptD</i>                  | pET23/42:: <i>lptD</i>                                                                          | (9)        |
| <i>plptD</i> <sub>Y721D</sub> | pET23/42:: <i>lptD</i> <sub>Y721D</sub>                                                         | (10)       |
| pCH13                         | pET24b-ns-lamB-His (V26-W446)                                                                   | This study |
| pCH86                         | pET22b-bamD-His6 (S21-T245)                                                                     | (11)       |
| pJW384                        | pET24b-lamB-His (G439A)                                                                         | This study |
| pJW387                        | pET24b-lamB-His (G439D)                                                                         | This study |
| pCH167                        | pET22b-FLAG-bamA 4 <sup>th</sup> quarter $\beta$ -barrel (S715-W810)                            | (12)       |
| pJW392                        | pET24b-nsFLAG-lamB-His                                                                          | This study |



| pJW397              | pET24b-nsFLAG-lamB                                            | This study                                            |
|---------------------|---------------------------------------------------------------|-------------------------------------------------------|
| pJW410              | pET24b-ns-lamB (353-446)                                      | This study                                            |
| pJW411              | pET24b-ns-lamB (353-446) (G439A)                              | This study                                            |
| pJW412              | pET24b-ns-lamB (353-446) (G439D)                              | This study                                            |
| pJW413              | pET24b-ns-lamB (26-121)                                       | This study                                            |
| Oligonucleotides    | Sequence (5' to 3')                                           | Description                                           |
| pZS21CamR Gibson F  | CGTTCTGAACAAATCCAGATGGAGTTCTGAGGTC<br>AAATTTGCTTTCGAATTTCTGC  | Amplifies Cam <sup>R</sup><br>cassette from<br>pBAD33 |
| pZS21 CamR Gibson R | AGGTTAATGTCATGATAATAATGGTTTCTTAGGG<br>GGAATAAATACCTGTGACGGAAG | Amplifies Cam <sup>R</sup><br>cassette from<br>pBAD33 |
| pZS21 backbone F    | CCCCTAAGAAACCATTATTATC                                        | Amplifies<br>pZS21 backbone                           |
| pZS21 backbone R    | TGACCTCAGAACTCCATCTG                                          | Amplifies<br>pZS21 backbone                           |
| lamB_G439A_F        | GCAGCCCAGATGGAAATCTGGTG                                       | Site directed<br>mutagenesis of<br><i>lamB</i>        |
| lamB_G439D_F        | GATGCCCAGATGGAAATCTGGTG                                       | Site directed<br>mutagenesis of<br><i>lamB</i>        |
| lamB_G439_R         | GAAGGTCCACTCGTCGCTGT                                          | Site directed<br>mutagenesis of<br><i>lamB</i>        |
| BH84-lamB-Fwd       | GTCGACTGCATAAGGAGCCG                                          | Amplify<br>chromosomal<br><i>lamB</i>                 |
| BH85-lamB-Rev       | ATTTGACAGCCGTTGTAGGCC                                         | Amplify<br>chromosomal<br><i>lamB</i>                 |
| BH241-degP-Fwd      | GTTCGGAACTTCAGGCTATA                                          | Amplify<br>chromosomal<br><i>degP</i>                 |
| BH242-degP-Rev      | TTGTGGTGAAGTTCACAGAT                                          | Amplify<br>chromosomal<br><i>degP</i>                 |
| LamB-His (G439A)    | CGTGGCGACAGCGACGAGTGGACCTTCGCTGCC<br>CAGATGGAAATCTGGTGG       |                                                       |
| LamB-His (G439A)-rc | CCACCAGATTTCCATCTGGGCAGCGAAGGTCCA<br>CTCGTCGCTGTCGCCACG       |                                                       |
| LamB-His (G439D)    | CGTGGCGACAGCGACGAGTGGACCTTCGATGCC<br>CAGATGGAAATCTGGTGG       |                                                       |

|                          |                                                                  |  |
|--------------------------|------------------------------------------------------------------|--|
| LamB-His (G439D)-rc      | CCACCAGATTTCCATCTGGGCATCGAAGGTCCA<br>CTCGTCGCTGTCGCCACG          |  |
| FLAG-nsLamB-His          | GTTTACTTTAAGAAGGAGATATACATATGGAC<br>TACAAAGACGATGACGACAAGGCTAGC  |  |
| FLAG-nsLamB-His-rc       | CGTGCATAGCCGTGGAAATCAACGCTAGCCTT<br>GTCGTCATCGTCTTTGTAGTCCATATG  |  |
| nsFLAG-LamB              | CTTCGGTGCCCAGATGGAAATCTGGTGGTGAGAT<br>CCGGCTGCTACAAGCCCG         |  |
| FLAG-bamAΔ422-<br>616-rc | CGGGCTTGTAGCAGCCGGATCTCACCACCAGAT<br>TTCCATCTGGGCACCGAAG         |  |
| nsLamB(353-446)          | GTTTACTTTAAGAAGGAGATATACATATGTAC<br>GACAACGTCGAATCCCAGCGCACCGGC  |  |
| nsLamB(353-446)-rc       | GCCGGTGCCTGGGATTCGACGTTGTCGTACATA<br>TGTATATCTCCTTCTTAAAGTAAAC   |  |
| nsLamB(26-121)           | GGTAAAAACCTGATCGAATGGCTGCCATGAGAT<br>CCGGCTGCTACAAGCCCGAAAGAAGC  |  |
| nsLamB(26-121)-rc        | GCTTCTTTCGGGCTTGTAGCAGCCGGATCTCA<br>TGGCAGCCATTTCGATCAGGTTTTTACC |  |

## References

1. **Boyd D, Weiss DS, Chen JC, Beckwith J.** 2000. Towards Single-Copy Gene Expression Systems Making Gene Cloning Physiologically Relevant: Lambda InCh, a Simple *Escherichia coli* Plasmid-Chromosome Shuttle System. *Journal of Bacteriology* **182**:842–847.
2. **Malinverni JC, Werner J, Kim S, Sklar JG, Kahne D, Misra R, Silhavy TJ.** 2006. YfiO stabilizes the YaeT complex and is essential for outer membrane protein assembly in *Escherichia coli*. *Mol Microbiol* **61**:151–164.
3. **Button JE, Silhavy TJ, Ruiz N.** 2007. A suppressor of cell death caused by the loss of  $\sigma^E$  downregulates extracytoplasmic stress responses and outer membrane vesicle production in *Escherichia coli*. *Journal of Bacteriology* **189**:1523–1530.

4. **Kang Y, Durfee T, Glasner JD, Qiu Y, Frisch D, Winterberg KM, Blattner FR.** 2004. Systematic Mutagenesis of the *Escherichia coli* Genome. *Journal of Bacteriology* **186**:4921–4930.
5. **Speiss C, Beil A, Ehrmann M.** 1999. A Temperature-Dependent Switch from Chaperone to Protease in a Widely Conserved Heat Shock Protein. *Cell* **97**:1339–3479.
6. **Lutz R, Bujard H.** 1997. Independent and tight regulation of transcriptional units in *Escherichia coli* via the LacR/O, the TetR/O and AraC/I<sub>1</sub>-I<sub>2</sub> regulatory elements. *Nucleic Acids Research* **25**:1203–1210.
7. **Wu T, McCandlish AC, Gronenberg LS, Chng S-S, Silhavy TJ, Kahne D.** 2006. Identification of a protein complex that assembles lipopolysaccharide in the outer membrane of *Escherichia coli*. *Proc Natl Acad Sci USA* **103**:11754–11759.
8. **Guzman L-M, Belin D, Carson MJ, Beckwith J.** 1995. Tight Regulation, Modulation, and High-Level Expression by Vectors Containing the Arabinose P<sub>BAD</sub> Promoter. *Journal of Bacteriology* **177**:4121–4130.
9. **Chng SS, Ruiz N, Chimalakonda G, Silhavy TJ, Kahne D.** 2010. Characterization of the two-protein complex in *Escherichia coli* responsible for lipopolysaccharide assembly at the outer membrane. *Proc Natl Acad Sci USA* **107**:5363–5368.
10. **Lee J, Sutterlin HA, Wzorek JS, Mandler MD, Hagan CL, Grabowicz M, Tomasek D, May MD, Hart EM, Silhavy TJ, Kahne D.** 2018. Substrate binding to BamD triggers a conformational change in BamA to control membrane insertion. *Proc Natl Acad Sci USA* **115**:2359–2364.

11. **Hagan CL, Westwood DB, Kahne D.** 2013. Bam Lipoproteins Assemble BamA in vitro. *Biochemistry* **52**:6108–6113.
12. **Hagan CL, Wzorek JS, Kahne D.** 2015. Inhibition of the  $\beta$ -barrel assembly machine by a peptide that binds BamD. *Proc Natl Acad Sci USA* **112**:2011–2016.
